# Supplementary material for: Population Genetic Structure of Marine Leech, Pterobdella arugamensis in Indo-West Pacific Region
Source: MDPI journal article supplement (doi:10.3390/genes13060956), 2022-05-26
Supplement: s1 [file s1]

## S1 Text. DNA sequences (463 bp) used.

>H1

AGGTTTGTAAATTCGAGCAGAATTATCACAAACCAGGTAGATTTATAGAAAATGATCAAATTTATAACTCAATAATTACAGCAC  
ATGGGTTAATTATAAATTTTTTTATAGTTATACCAATTCTAATTGGTGGTTTTGGTAACTGGCTAGTACCTTTAATAAATTGGTG  
CTCCAGACATGGCTTTTCCACGACTTAATAATCTTAGATTTTGATTATTACCACCATCATTAAATCTTCTTTTATCATCTGCATT  
AATTGAAAGTGGGGTTGGTACAGGTTGAACAGTCTACCCACCATTATCAGCTAATATAGCTCATTCTGGACCATCAGTAGAT  
TTAGCAATTTTTTCTTTACATTTAGCAGGAATTCATCAATTTTAGGTGCATTAAATTTTATTACAACAATTTTAAATATACGA  
TGAAATGGATTAAAATTAGAGCGTATATCATTATTTGTTTGAGCAG

>H2

AGGTTTGTAAATTCGAGCAGAATTATCACAAACCAGGTAGATTTATAGAAAATGATCAAATTTATAACTCAATAATTACAGCAC  
ATGGGTTAATTATAAATTTTTTTATAGTTATACCAATTCTAATTGGTGGTTTTGGTAACTGGCTAGTACCTTTAATAAATTGGTG  
CTCCAGACATGGCTTTTCCACGACTTAATAATCTTAGATTTTGATTATTACCACCATCATTAAATCTTCTTTTATCATCTGCATT  
AATTGAAAGTGGGGTTGGTACAGGTTGAACAGTCTACCCACCATTATCAGCTAATATAGCTCATTCTGGACCATCAGTAGAT  
TTAGCAATTTTTTCTTTACATTTAGCAGGAATTCATCAATTTTAGGTGCATTAAATTTTATTACAACAATTTTAAATATACGA  
TGAAATGGGTTAAAATTAGAACGTATATCATTATTTGTTTGAGCAG

>H3

AGGTTTGTAAATTCGAGCAGAATTATCACAAACCAGGTAGATTTATAGAAAATGATCAAATTTATAACTCAATAATTACAGCAC  
ATGGGTTAATTATAAATTTTTTTATAGTTATACCAATTCTAATTGGTGGTTTTGGTAACTGGCTAGTACCTTTAATAAATTGGTG  
CTCCAGACATGGCTTTTCCACGACTTAATAATCTTAGATTTTGATTATTACCACCATCATTAAATCTTCTTTTATCATCTGCATT  
AATTGAAAGTGGGGTTGGTACAGGTTGAACAGTATACCCACCATTATCAGCTAATATAGCTCATTCTGGACCATCAGTAGAT  
TTAGCAATTTTTTCTTTACATTTAGCAGGAATTCATCAATTTTAGGTGCATTAAATTTTATTACAACAATTTTAAATATACGA  
TGAAATGGGTTAAAATTAGAACGTATATCATTATTTGTTTGAGCAG

>H4

AGGTTTGTAAATTCGAGCAGAATTATCACAAACCAGGTAGATTTATAGAAAATGATCAAATTTATAACTCAATAATTACAGCAC  
ATGGGTTAATTATAAATTTTTTTATAGTTATACCAATTCTAATTGGTGGTTTTGGTAACTGGCTAGTACCTTTAATAAATTGGTG  
CTCCAGACATGGCTTTTCCACGACTTAATAATCTTAGATTTTGATTATTACCACCATCATTAAATCTTCTTTTATCATCTGCATT  
AATTGAAAGTGGGGTTGGTACAGGTTGAACAGTCTACCCACCATTATCAGCTAATATAGCTCATTCTGGGCCATCAGTAGAT  
TTAGCAATTTTTTCTTTACATTTAGCAGGAATTCATCAATTTTAGGTGCATTAAATTTTATTACAACAATTTTAAATATACGA  
TGAAATGGGTTAAAATTAGAACGTATATCATTATTTGTTTGAGCAG

>H5

AGATTTGTAAATTCGAGCAGAACTATCACAAACCAGGTAGATTTATAGAAAATGATCAAATTTATAAATCAATAATTACGGCAC  
ATGGGTTAATTATAAATTTTTTTATAGTTATACCAATTTAATTGGTGGTTTTGGTAACTGGTTAGTACCTTTAATAAATTGGTG  
CTCCAGATATGGCTTTCCACGACTTAATAATCTTAGATTTTGATTATTACCACCATCATTAAATCTTCTTTTATCATCTGCATT  
AATTGAAAGTGGGGTTGGTACAGGTTGAACAGTTACCCACCATTAGCAGCTAATATAGCTCATTCTGGGCCATCAGTAGAT  
TTAGCAATTTTTTCTTTACATTTAGCAGGAATTCATCAATTTTAGGTGCATTAAATTTTATTACAACAATTTTAAATATACGA  
TGAAATGGATTAAAATTAGAACGTATATCATTATTTGTTTGAGCAG

>H6

AGGTTTGTAAATTCGAGCAGAATTATCACAAACCAGGTAGATTTATAGAAAATGATCAAATTTATAACTCAATAATTACAGCAC  
ATGGGTTAATTATAAATTTTTTTATAGTTATACCAATTCTAATTGGTGGTTTTGGTAACTGGCTAGTACCTTTAATAAATTGGTG  
CTCCAGACATGGCTTTTCCACGACTTAATAATCTTAGATTTTGATTATTACCACCATCATTAAATCTTCTTTTATCATCTGCATT  
AATTGAAAGTGGGGTTGGTACAGGTTGAACAGTATACCCACCATTATCAGCTAATATAGCTCATTCTGGACCATCAGTAGAT  
TTAGCAATTTTTTCTTTACATTTAGCAGGAATTCATCAATTTTAGGTGCATTAAATTTTATTACAACAATTTTAAATATACGA  
TGAAATGGATTAAAATTAGAGCGTATATCATTATTTGTTTGAGCAG

>H7

AGGTTTGTAAATTCGAGCAGAATTATCACAAACCAGGTAGATTTATAGAAAATGATCAAATTTATAACTCAATAATTACAGCAC  
ATGGGTTAATTATAAATTTTTTTATAGTTATACCAATTCTAATTGGTGGTTTTGGTAACTGGCTAGTACCTTTAATAAATTGGTG  
CTCCAGACATGGCTTTTCCACGACTTAATAATCTTAGATTTTGATTATTACCACCATCATTAAATCTTCTTTTATCATCTGCATT  
AATTGAAAGTGGGGTTGGTACAGGTTGGACAGTCTACCCACCATTATCAGCTAATATAGCTCATTCTGGACCATCAGTAGAT  
TTAGCAATTTTTTCTTTGATTTAGCAGGAATTCATCAATTTTAGGTGCATTAAATTTTATTACAACAATTTTAAATATACGA  
TGAAATGGGTTAAAATTAGAACGTATATCATTATTTGTTTGAGCAG

>H8

AGGTTTGTAAATTCGAGCAGAATTATCACAAACCAGGTAGATTTATAGAAAATGATCAAATTTATAAATCAATAATTACAGCAC  
ATGGATTAAATTATAAATTTTTTTATAGTTATACCAATTTAATTGGTGGTTTTGGTAACTGATTGGTACCTTTAATAAATTGGTG  
CTCCAGATATAGCTTTTCCACGACTTAATAATCTTAGATTTTGATTATTACCTCCATCATTAAATCTTCTTTTATCATCTGCATT  
AATTGAAAGTGGAGTTGGTACAGGTTGAACAATTTATCCACCATTAGCAGCTAATATAGCCATTACAGGTCCATCAGTAGAT  
TTAGCAATTTTTTCTTTACATTTAGCAGGAATTCATCAATTTTAGGTGCATTAAATTTTATTACAACAATTTTAAATATACGA  
TGAAATGGATTAAAATTAGAACGTATATCATTATTTGTTTGAGCAG

>H9

AGGTTTGTAAATTCGAGCAGAATTATCACAAACCAGGTAGATTTATAGAAAATGATCAAATTTATAACTCAATAATTACAGCAC  
ATGGGTTAATTATAAATTTTTTTATAGTTATACCAATTCTAATTGGTGGTTTTGGTAACTGGCTAGTACCTTTAATAAATTGGTG  
CTCCAGACATGGCTTTTCCACGACTTAATAATCTTAGATTTTGATTATTACCACCATCATTAAATCTTCTTTTATCATCTGCATT  
AATTGAAAGTGGGGTTGGTACAGGTTGAACAGTATACCCACCATTATCAGCTAATATAGCTCATTCTGGACCATCAGTAGAT  
TTAGCAATTTTTTCTTTACATTTAGCAGGAATTCATCAATTTTAGGTACATTAAATTTTATTACAACAATTTTAAATATACGA  
TGAAATGGGTTAAAATTAGAACGTATATCATTATTTGTTTGAGCAG

>H10

AGGTTTGTAAATTCGAGCAGAATTATCACAACCAGGTAGATTTATAGAAAATGATCAAATTTATAACTCAATAATTACAGCAC  
ATGGGTTAATTATAAATTTTTTTATAGTTATACCAATTCTAATTGGTGGTTTTGGTAACTGGCTAGTACCTTTAATAAATTGGTG  
CTCCAGACATGGCTTTTCCACGACTTAATAATCTTAGATTTTGATTATTACCACCATCATTAATTCTTCTTTATCATCTGCATT  
AATTGAAAGTGGGGTTGGTACAGGTTGAACAGTCTACCCACCATTATCAGCTAATATAGCTCATTCTGGACCATCAGTAGAT  
TTAGCAATTTTTTCTTTGCATTTAGCAGGAATTCATCAATTTTAGGTGCATTAAATTTTATTACAACAATTTTAAATATACGA  
TGAAATGGGTTAAAATTAGAACGTATATCATTATTTGTTTGAGCAG

>H11

AGGTTTGTAAATTCGAGCAGAATTATCACAACCAGGTAGATTTATAGAAAATGATCAAATTTATAACTCAATAATTACAGCAC  
ATGGGTTAATTATAAATTTTTTTATAGTTATACCAATTCTAATTGGTGGTTTTGGTAACTGGCTAGTACCTTTAATAAATTGGTG  
CTCCAGACATGGCTTTTCCACGACTTAATAATCTTAGATTTTGATTATTACCACCATCATTAATTCTTCTTTATCATCTGCATT  
AATTGAAAGTGGGGTTGGTACAGGTTGAACAGTCTACCCACCATTATCAGCTAATATAGCTCATTCTGGACCATCAGTAGAT  
TTAGCAATTTTTTCTTTACATTTAGCAGGAATTCATCAATTTTAGGTGCATTAAATTTTATTACAACAATTTTAAATATACGA  
TGAAATGGATTAAAATTAGAACGTATATCATTATTTGTTTGAGCAG

>H12

AGGTTTGTAAATTCGAGCAGAATTATCACAACCAGGTAGATTTATAGAAAATGAACAAATTTATAACTCAATAATTACAGCAC  
ATGGGTTAATTATAAATTTTTTTATAGTTATACCAATTCTAATTGGTGGTTTTGGTAACTGGCTAGTACCTTTAATAAATTGGTG  
CTCCAGACATGGCTTTTCCACGACTTAATAATCTTAGATTTTGATTATTACCACCATCATTAATTCTTCTTTATCATCTGCATT  
AATTGAAAGTGGGGTTGGTACAGGTTGAACAGTCTACCCACCATTATCAGCTAATATAGCTCATTCTGGACCATCAGTAGAT  
TTAGCAATTTTTTCTTTACATTTAGCAGGAATTCATCAATTTTAGGTGCATTAAATTTTATTACAACAATTTTAAATATACGA  
TGAAATGGGTTAAAATTAGAACGTATATCATTATTTGTTTGAGCAG

>H13

AGGTTTGTAAATTCGAGCAGAATTATCACAACCAGGTAGATTTATAGAAAATGATCAAATTTATAAATCAATAATTACAGCAC  
ATGGGTTAATTATAAATTTTTTTATAGTTATACCAATTTAATTGGTGGTTTTGGTAACTGATTGGTACCTTTAATAAATTGGTG  
CCCCAGATATAGCTTTCCACGACTTAATAATCTTAGATTTTGATTATTACCTCCATCATTAATTCTTCTTTATCATCTGCATT  
AATTGAAAGTGGAGTTGGTACAGGTTGAACAGTTTACCCACCATTATCAGCTAATATAGCCCATTCAGGTCCATCAGTAGAT  
TTAGCAATTTTTTCTTTACATTTAGCAGGAATTCATCAATTTTAGGTGCATTAAATTTTATTACAACAATTTTAAATATACGA  
TGAAATGGATTAAAATTAGAACGTATATCATTATTTGTTTGAGCAG

>H14

AGATTTGTAAATTCGAGCAGAATTATCACAACCAGGTAGATTTATAGAAAATGACCAAATTTATAAATCAATAATTACAGCAC  
ATGGTTTAATTATAAATTTTTTTATAGTAATACCTATTTAATTGGTGGGTTTTGGTAATTGATTAGTACCATTAATAAATTGGTG  
CACCAGACATAGCTTTTCCACGACTTAATAATCTTAGATTTTGATTATTACCACCTTCATTAATTCTTCTTTATCATCTGCATT  
AATTGAAAGTGGTGTAGGTACAGGTTGAACGTGTTATCCGCCATTATCAGCTAATATAGCTCATTCTGGGCCATCAGTGGATT  
TAGCAATTTTTTCTTTACATTTAGCGGGAATTCATCTATTTTAGGTGCATTAAATTTTATTACTACAATTTTAAATATGCGAT  
GAAATGGATTGAAATTAGAACGTATATCATTATTTGTTTGAGCAG

>H15

AGATTTGTAAATTCGAGCAGAATTATCACAACCAGGTAGATTTATAGAAAATGACCAAATTTATAAATCAATAATTACAGCAC  
ATGGTTTAATTATAAATTTTTTTATAGTAATACCTATTTAATTGGTGGGTTTTGGTAATTGATTAGTACCATTAATAAATTGGTG  
CACCAGACATAGCTTTTCCACGACTTAATAATCTTAGATTTTGATTATTACCACCTTCATTAATTCTTCTTTATCATCTGCATT  
AATTGAAAGTGGTGTAGGTACAGGTTGAACGTGTTATCCGCCATTATCAGCTAATATAGCTCATTCTGGACCATCAGTGGATT  
TAGCAATTTTTTCTTTACATTTAGCGGGAATTCATCTATTTTAGGTGCATTAAATTTTATTACTACAATTTTAAATATGCGAT  
GAAATGGATTGAAATTAGAACGTATATCATTATTTGTTTGAGCAG

>H16

AGATTTGTAAATTCGAGCAGAATTATCACAACCAGGTAGATTTATAGAAAATGACCAAATTTATAAATCAATAATTACAGCAC  
ATGGTTTAATTATAAATTTTTTTATAGTAATACCTATCTTAATTGGTGGGTTTTGGTAATTGATTAGTACCATTAATAAATTGGTG  
CACCAGACATAGCTTTTCCACGACTTAATAATCTTAGATTTTGATTATTACCACCTTCATTAATTCTTCTTTATCATCTGCATT  
AATTGAAAGTGGTGTAGGTACAGGTTGAACGTGTTATCCGCCATTATCAGCTAATATAGCTCATTCTGGACCATCAGTGGATT  
TAGCAATTTTTTCTTTACATTTAGCGGGAATTCATCTATTTTAGGTGCATTAAATTTTATTACTACAATTTTAAATATGCGAT  
GAAATGGATTGAAATTAGAACGTATATCATTATTTGTTTGAGCAG

>Aestab della abditovesiculata (DQ414300)

AGATTTGTTATTCGAGCAGAATGTACACAACCAGGAAGATTTGTAGAAAATGATCAAATTTATAAATCAATAATTACAGCAC  
ATGGCTTAATTATAAATTTTCTTTATAGTAATACCAATTTAATTGGTGGATTGGTAATTGATTAGTCCACTAATAAATTGGTG  
CACCAGACATAGCATTCCACGACTTAATAATCTTAGATTTTGATTACTACCACCATCACTTATTCTTCTTTATCATCAGCAT  
TAGTTGAAAGGGGGGTAGGTACAGGTTGAACAGTATACCCACCATTATCAGCTAATATAGCCCATTCAGGTCCATCAGTTGA  
CCTAGCAATTTTTTCTTTACATTTAGCAGGAATTCATCTATTTTAGGAGCTTTAAATTTTATTACAACAATTTTAAACATACG  
ATGAAAAGGCTTAAAATTAGAGCGTATATCATTATTTGTTTGAGCAG
