# Supplementary material for: Population Genetic Structure of Marine Leech, Pterobdella arugamensis in Indo-West Pacific Region
Source: MDPI journal article supplement (doi:10.3390/genes13060956), 2022-05-26
Supplement: s1 [file s1]

**A**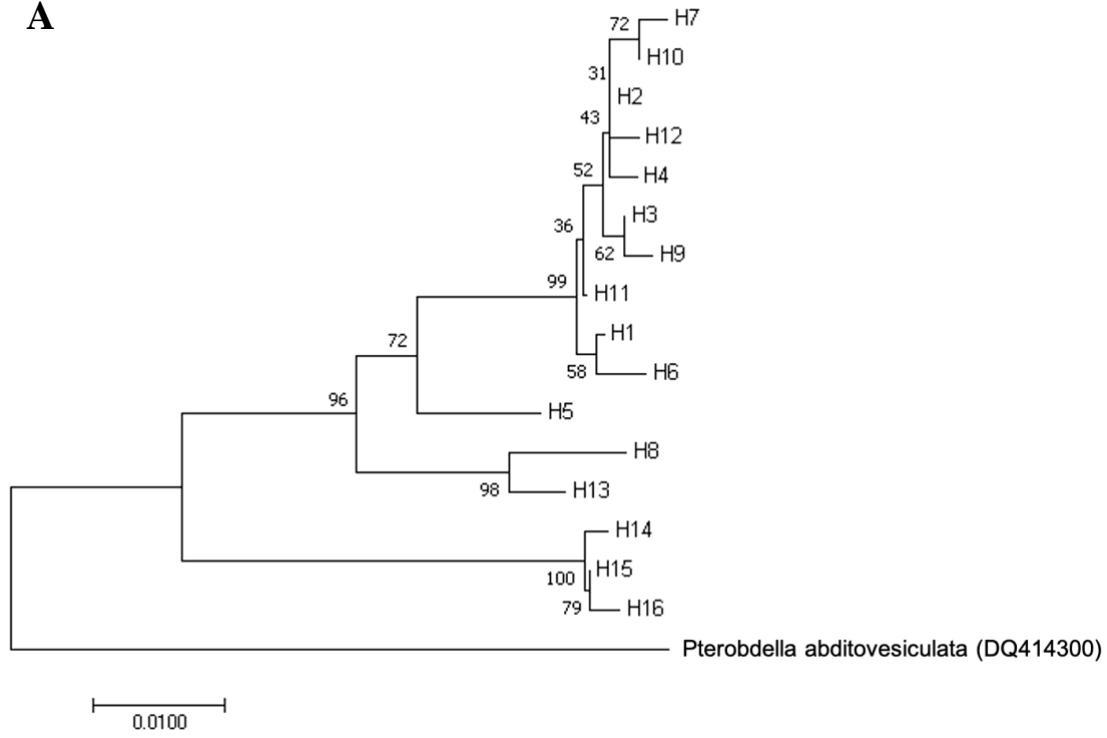**B**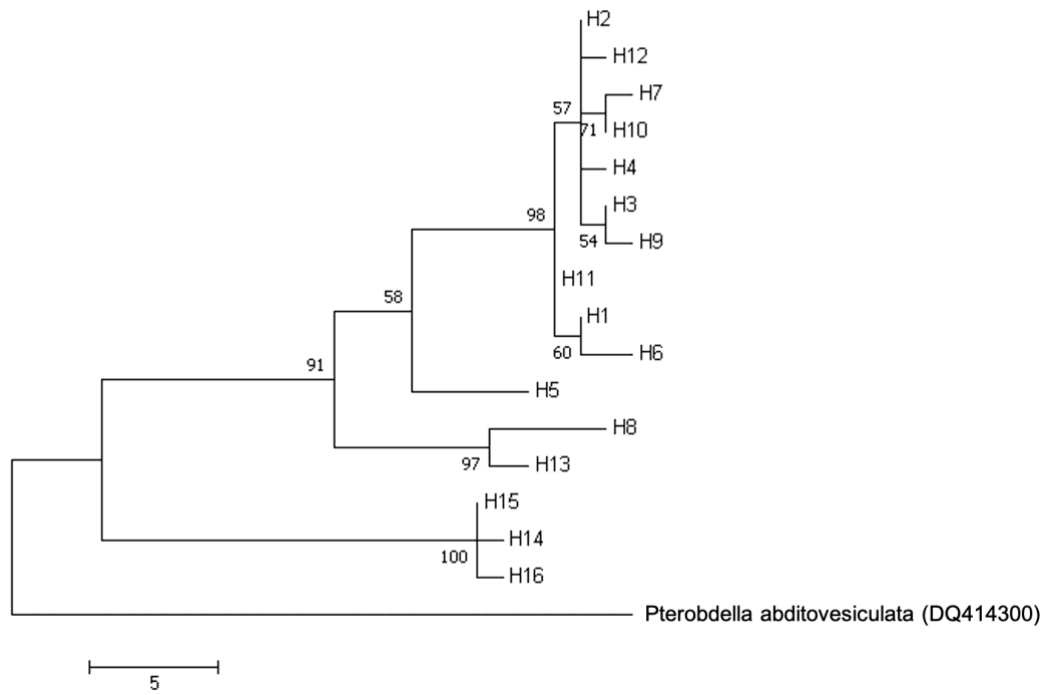

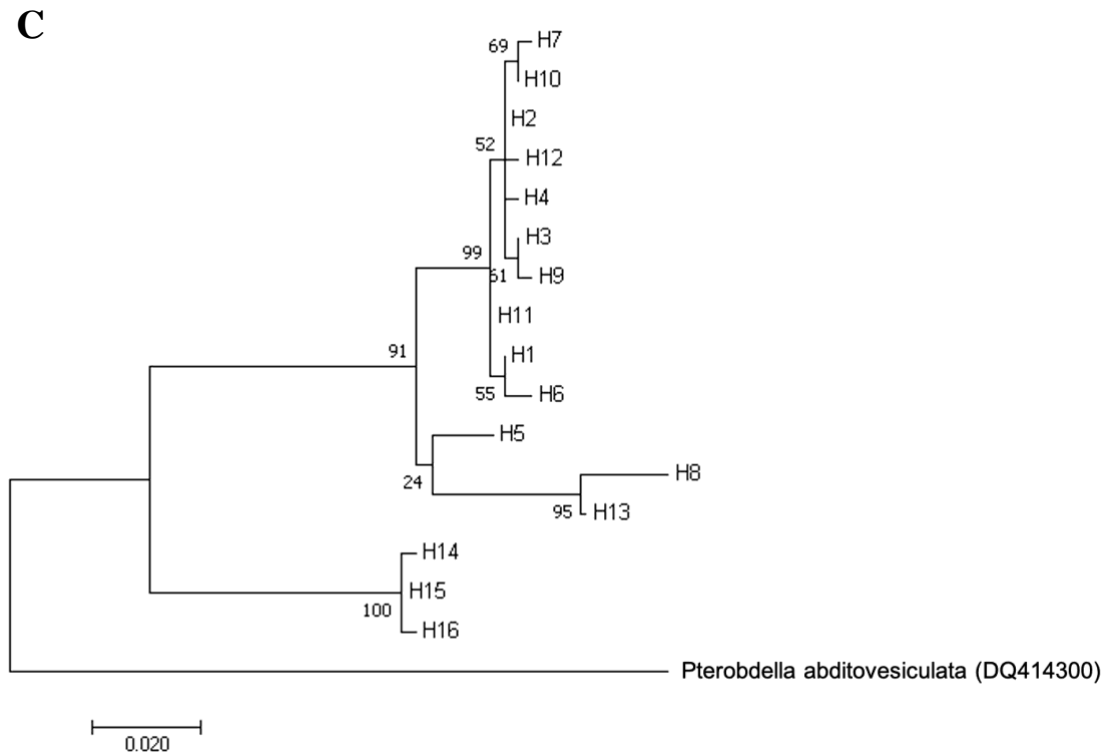

**Figure S1. Phylogenetic trees of *P. arugamensis* based on CO1 gene sequences with *P. abditovesiculata* used as an outgroup.** A: Neighbor joining (NJ) tree, B: Maximum parsimony (MP) tree, C: Maximum likelihood (ML) tree.
